# Supplementary material for: CSL112 (Apolipoprotein A-I [Human]) Enhances Cholesterol Efflux Similarly in Healthy Individuals and Stable Atherosclerotic Disease Patients
Source: PubMed Central journal article supplement (PMC5895137; doi:10.1161/atvbaha.118.310538), 2018-02-08

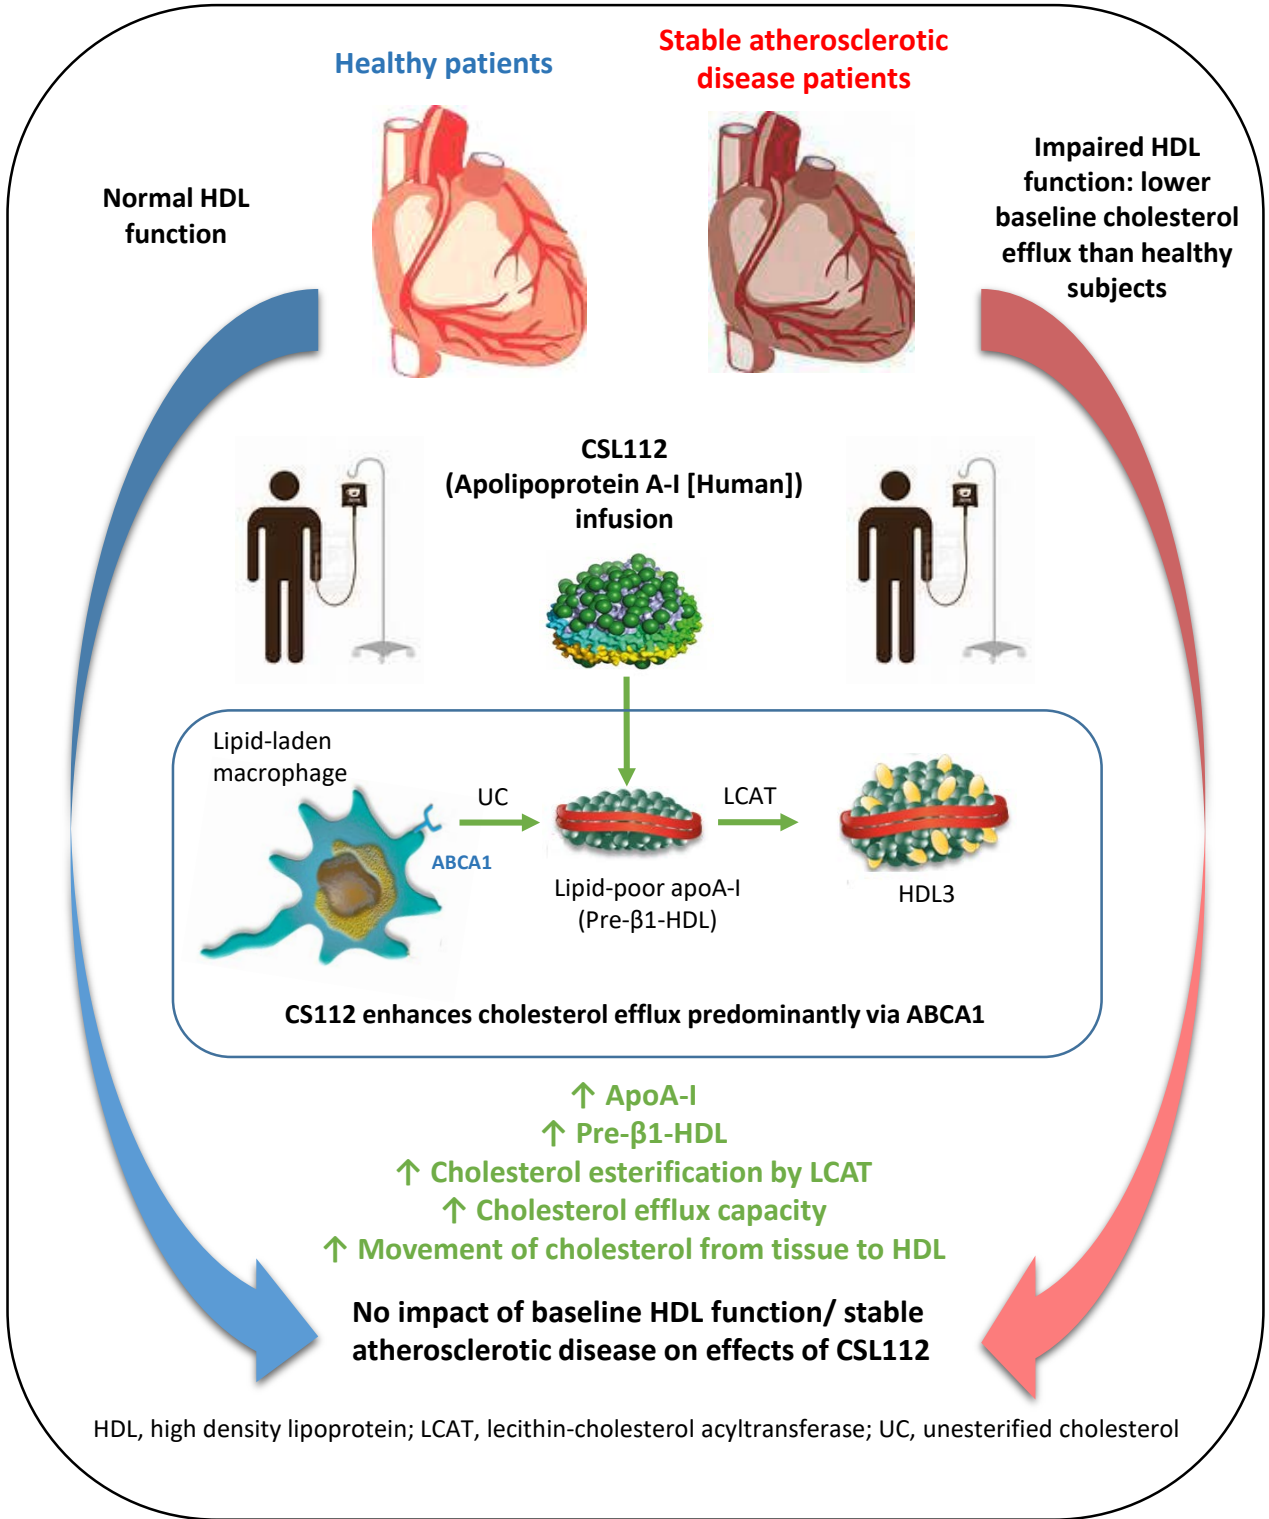

Supplement: atv-38-953-s002.pdf [file atv-38-953-s002.pdf]
